# Supplementary material for: MiR-92a Family: A Novel Diagnostic Biomarker and Potential Therapeutic Target in Human Cancers
Source: PubMed Central journal article supplement (PMC6779690; doi:10.3389/fmolb.2019.00098), 2019-10-01
Supplement: Data_Sheet_1.pdf [file Data_Sheet_1.pdf]

# MiR-92a family: A Novel Diagnostic Biomarker and Potential Therapeutic Target in Human Cancers

Min Jiang<sup>1</sup>, Xuelian Li<sup>1</sup>, Xiaowei Quan<sup>1</sup>, Xiaoying Li<sup>1</sup>, Baosen Zhou<sup>1\*</sup>

1 Department of Epidemiology, School of Public Health, China Medical University, Shenyang, People's Republic of China.

\* Correspondence:

Baosen Zhou

No. 77 Puhe Road, Shenyang North New Area, Shenyang, Liaoning province, 110122, People's Republic of China.

Tel./Fax: +86-133-8688-1563

[bszhou@cmu.edu.cn](mailto:bszhou@cmu.edu.cn)

## Supplementary appendix to the manuscript

**Table S1 main characteristics of enrolled studies in diagnostic meta-analyses**

| Study ID    | ethnicity | specime<br>n | cas<br>e | con<br>trol |     | Cancer-t<br>ype | Control-<br>type | stage | miRNA | Reference<br>miRNA                   | SEN<br>(%) | SPE<br>(%) |
|-------------|-----------|--------------|----------|-------------|-----|-----------------|------------------|-------|-------|--------------------------------------|------------|------------|
|             |           |              |          | N           | age |                 |                  |       |       |                                      |            |            |
| MiR-92a     |           |              |          |             |     |                 |                  |       |       |                                      |            |            |
| Liu HN 2018 | Asian     | serum        | 85       | 59.5        | 78  | 34.8            | CRC              | HC    | I-IV  | miR-92a, miR-29a, miR-21, cel-miR-39 | 84.7       | 98.7       |

|                  |          |        |     |      |     |      |       |       |         |                                              |             |             |      |       |
|------------------|----------|--------|-----|------|-----|------|-------|-------|---------|----------------------------------------------|-------------|-------------|------|-------|
| Liu HN 2018      | Asian    | serum  | 85  | 59.5 | 78  | 34.8 | CRC   | HC    | I -IV   | miR-92a                                      |             | cel-miR-39  | 78.8 | 71.8  |
| Elshafei A 2017  | Oceanian | serum  | 64  | 51.4 | 27  | 46.4 | CRC   | HC    | I -IV   | miR-92a                                      |             | SNORD-68    | 84.4 | 100.0 |
| Elshafei A 2017  | Oceanian | serum  | 32  | 51.8 | 27  | 46.4 | CRC   | HC    | I -II   | miR-92a                                      |             | SNORD-68    | 78.1 | 100.0 |
| Elhamamsy A 2017 | African  | plasma | 65  | 55.3 | 50  | 54.7 | AML   | HC    | NA      | miR-92a                                      |             | U6          | 81.5 | 94.0  |
| MotawKi TK 2016  | Oceanian | plasma | 70  | 56.2 | 62  | 57.2 | BLC   | HC    | II -III | miR-92a                                      |             | U6          | 97.0 | 76.7  |
| MotawKi TK 2016  | Oceanian | plasma | 70  | 56.2 | 62  | 57.2 | BLC   | HC    | II -III | miR-92a,miR-100 and miR-143                  |             | U6          | 94.3 | 83.3  |
| Chang PY 2016    | Asian    | plasma | 353 | 62.9 | 492 | 52.5 | CRC   | HC    | I -IV   | miR-92a,miR-223                              |             | cel-miR-238 | 96.8 | 75.0  |
| Fan LH 2016      | Asian    | serum  | 94  | 60.5 | 58  | 58.1 | NSCLC | HC    | I -III  | miR-92a                                      |             | -           | 86.8 | 65.5  |
| Huang S 2016     | Asian    | serum  | 30  | NA   | 30  | NA   | GC    | HC    | I -IV   | miR-21,miR-31,<br>miR-181b, miR-203          | miR-92a,    | miR-16      | 90.0 | 96.7  |
| Huang S 2016     | Asian    | serum  | 62  | NA   | 59  | NA   | GC    | HC    | I -IV   | miR-21,miR-31,<br>miR-181b, miR-203          | miR-92a,    | miR-16      | 85.5 | 98.3  |
| Wen Y 2015       | Asian    | plasma | 67  | 48.5 | 82  | 48.6 | HCC   | BD    | NA      | miRNAs <sup>a</sup>                          |             | cel-miR-39  | 86.6 | 64.6  |
| Zhu C 2014       | Asian    | plasma | 40  | 53.8 | 40  | 53.6 | GC    | HC    | I -II   | miR-92a                                      |             | cel-miR-39  | 97.5 | 85.0  |
| Zhu C 2014       | Asian    | plasma | 40  | 53.8 | 40  | 53.6 | GC    | HC    | I -II   | miR-16, miR-25,<br>miR-451, miR-486-5p       | miR-92a,    | cel-miR-39  | 97.5 | 87.5  |
| Zhu C 2014       | Asian    | plasma | 48  | 56.6 | 102 | 54.0 | GC    | HC,BD | I -II   | miR-92a                                      |             | cel-miR-39  | 72.9 | 73.5  |
| Zhu C 2014       | Asian    | plasma | 48  | 56.6 | 102 | 54.0 | GC    | HC,BD | I -II   | miR-16, miR-25,<br>miR-451, miR-486-5p       | miR-92a,    | cel-miR-39  | 72.9 | 89.2  |
| Du ML 2014       | Asian    | plasma | 49  | 61.1 | 49  | 61.7 | CRC   | HC    | II -III | miR-92a                                      |             | cel-miR-39  | 18.4 | 95.9  |
| Zheng G 2014     | Asian    | serum  | 117 | 56.3 | 175 | 52.6 | CRC   | BD,HC | I -IV   | miR-19a-3p, miR-223-3p, miR-92a,<br>miR-422a | miR-191-5p, | U6          | 84.3 | 91.6  |

|                   |           |        |     |      |     |      |       |    |       |                                                              |                     |      |       |
|-------------------|-----------|--------|-----|------|-----|------|-------|----|-------|--------------------------------------------------------------|---------------------|------|-------|
| Wang J 2014       | Asian     | serum  | 30  | NA   | 30  | NA   | CRC   | HC | I -IV | miR-21, let-7g, miR-31, miR-92a, miR-16<br>miR-181b, miR-203 | 83.3                | 96.7 |       |
| Wang J 2014       | Asian     | serum  | 83  | NA   | 59  | NA   | CRC   | HC | I -IV | miR-21, let-7g, miR-31, miR-92a, miR-16<br>miR-181b, miR-203 | 96.4                | 88.1 |       |
| Liu GH 2013       | Asian     | serum  | 200 | NA   | 80  | NA   | CRC   | HC | I -IV | miR-92a, miR-21                                              | miR-16              | 68.0 | 91.2  |
| Liu GH 2013       | Asian     | serum  | 200 | NA   | 80  | NA   | CRC   | HC | I -IV | miR-92a                                                      | miR-16              | 65.5 | 82.5  |
| Wang SY 2013      | Asian     | tissue | 25  | NA   | 21  | NA   | CRC   | BD | NA    | miR-375, miR-424, miR-92a                                    | U47                 | 92.0 | 95.0  |
| Wang SY 2013      | Asian     | tissue | 25  | NA   | 20  | NA   | CRC   | BD | NA    | miR-375, miR-424, miR-92a                                    | U47                 | 96.0 | 90.0  |
| Wang SY 2013      | Asian     | tissue | 33  | NA   | 25  | NA   | CRC   | BD | NA    | miR-375, miR-424, miR-92a                                    | U47                 | 94.0 | 84.0  |
| Luo XY 2013       | Caucasian | plasma | 80  | 68.0 | 144 | 62.5 | CRC   | BD | I -IV | miR-92a                                                      | miR-16              | 68.2 | 49.4  |
| Torres A 2013     | Caucasian | tissue | 73  | 62.8 | 31  | 44.8 | EEC   | BD | I -IV | miR-92a                                                      | U48, U44, U75       | 78.0 | 90.0  |
| Torres A 2013     | Caucasian | tissue | 73  | 62.8 | 31  | 44.8 | EEC   | BD | I -IV | miR-92a, miR-205, miR-410                                    | U48, U44, U75       | 96.0 | 100.0 |
| Torres A 2013     | Caucasian | plasma | 34  | 60.2 | 14  | 54.7 | EEC   | HC | I -IV | miR-92a                                                      | miRNAs <sup>b</sup> | 61.0 | 93.0  |
| Torres A 2013     | Caucasian | plasma | 34  | 60.2 | 14  | 54.7 | EEC   | HC | I -IV | miR-92a, miR-9                                               | miRNAs <sup>b</sup> | 73.0 | 100.0 |
| Wu CW 2012        | Asian     | stool  | 88  | 67.2 | 101 | 60.5 | CRC   | HC | I -IV | miR-92a, miR-21                                              | U6                  | 81.8 | 57.4  |
| Wu CW 2012        | Asian     | stool  | 88  | 67.2 | 101 | 60.5 | CRC   | HC | I -IV | miR-92a                                                      | U6                  | 71.6 | 73.3  |
| Wang QF 2012      | Asian     | plasma | 90  | 62.0 | 58  | 58.0 | CRC   | HC | I -IV | miR-92a, miR-29a, miR-760                                    | cel-miR-39          | 83.3 | 93.1  |
| Baraniskin A 2011 | Caucasian | CF     | 23  | 64.0 | 30  | NA   | PCNSL | BD | NA    | miR-92a                                                      | miR-24              | 95.7 | 80.0  |
| Ng EK 2009        | Asian     | plasma | 90  | NA   | 50  | NA   | CRC   | HC | I -IV | miR-92a                                                      | U6                  | 89.0 | 70.0  |
| Huang ZH 2009     | Asian     | plasma | 100 | 61.0 | 59  | 58.0 | CRC   | HC | I -IV | miR-92a, miR-29a                                             | miR-16              | 83.0 | 84.7  |

|                    |           |           |     |      |     |      |     |        |      |                                   |  |              |      |      |
|--------------------|-----------|-----------|-----|------|-----|------|-----|--------|------|-----------------------------------|--|--------------|------|------|
| Huang ZH 2009      | Asian     | plasma    | 100 | 61.0 | 59  | 58.0 | CRC | HC     | I-IV | miR-92a                           |  | miR-16       | 84.0 | 71.2 |
| <b>MiR-25</b>      |           |           |     |      |     |      |     |        |      |                                   |  |              |      |      |
| Li FX 2017         | Asian     | plasma    | 65  | 54.1 | 65  | 56.2 | GC  | HC     | I-IV | miR-25                            |  | U6           | 87.6 | 76.9 |
| Le Q 2017          | Asian     | serum     | 41  | 61.0 | 41  | 58.0 | GC  | HC     | NA   | miR-25                            |  | U6           | 78.1 | 61.0 |
| Fujiwara I T 2017  | Asian     | serum     | 14  | NA   | 22  | NA   | OS  | HC, BD | NA   | miR-25                            |  | cel-miR-39   | 71.4 | 92.3 |
| Johansen JS 2016   | Caucasian | serum     | 133 | NA   | 51  | NA   | PC  | HC     | I-IV | miR-16, miR-27a, miR-25, miR-29c, |  | miR-292,     | 85.0 | 33.0 |
|                    |           |           |     |      |     |      |     |        |      | miR-483-5p                        |  | miR-259      |      |      |
| Johansen JS 2016   | Caucasian | serum     | 198 | NA   | 153 | NA   | PC  | HC     | I-IV | miR-16, miR-27a, miR-25, miR-29c, |  | miR-292,     | 85.0 | 66.0 |
|                    |           |           |     |      |     |      |     |        |      | miR-483-5p                        |  | miR-259      |      |      |
| Johansen JS 2016   | Caucasian | serum     | 86  | NA   | 44  | NA   | PC  | HC     | I-IV | miR-16, miR-27a, miR-25, miR-29c, |  | miR-292,     | 85.0 | 67.0 |
|                    |           |           |     |      |     |      |     |        |      | miR-483-5p                        |  | miR-259      |      |      |
| Deng T 2016        | Asian     | serum     | 303 | 62.0 | 600 | 49.0 | PC  | HC     | I-IV | miR-25                            |  | U6, 5S rRNAs | 75.6 | 93.0 |
| Cochetti G 2016    | Caucasian | serum     | 64  | 63.0 | 60  | NA   | PRC | BD     | NA   | miR-25                            |  | miR-191-5p,  | 38.5 | 88.0 |
|                    |           |           |     |      |     |      |     |        |      |                                   |  | miR-425-5p   |      |      |
| Cappellesso R 2016 | Caucasian | cytologic | 29  | 73.2 | 24  | 61.2 | MM  | BD     | NA   | miR-25                            |  | U6           | 54.0 | 72.0 |
| Bryzgunova O 2016  | Caucasian | Urine     | 14  | 72.0 | 20  | 59.0 | PRC | HC     | NA   | miR-25                            |  | miR-16       | 71.0 | 60.0 |
|                    |           | exosome   |     |      |     |      |     |        |      |                                   |  |              |      |      |
| Butz H 2016        | Caucasian | urine     | 28  | 59.0 | 18  | NA   | RCC | HC     | NA   | miR-126-3p, miR-25                |  | miR-16, miR- | 62.1 | 85.0 |
|                    |           | exosome   |     |      |     |      |     |        |      |                                   |  | 106a         |      |      |
| Butz H 2016        | Caucasian | urine     | 81  | NA   | 33  | NA   | RCC | HC     | NA   | miR-126-3p, miR-25                |  | miR-16, miR- | 52.5 | 86.2 |
|                    |           | exosome   |     |      |     |      |     |        |      |                                   |  | 106a         |      |      |
| Zhou X 2015        | Asian     | plasma    | 101 | NA   | 91  | NA   | GC  | HC     | I-IV | miR-185, miR-20a, miR-210,        |  | cel-miR-39,  | 65.0 | 80.0 |

|              |           |        |     |      |     |      |       |    |      |                                                                                          |                 |            |       |      |
|--------------|-----------|--------|-----|------|-----|------|-------|----|------|------------------------------------------------------------------------------------------|-----------------|------------|-------|------|
|              |           |        |     |      |     |      |       |    |      |                                                                                          | miR-25, miR-92b | U6         |       |      |
| Wen Y 2015   | Asian     | plasma | 67  | 48.5 | 82  | 48.6 | HCC   | BD | NA   | miR-25                                                                                   |                 | cel-miR-39 | 55.3  | 79.3 |
| Wen Y 2015   | Asian     | plasma | 67  | 48.5 | 82  | 48.6 | HCC   | BD | NA   | miR-20a-5p, miR-25, miR-30a-5p, miR-92a-3p, miR-132-3p, miR-185-5p, miR-320a, miR-324-3p |                 | cel-miR-39 | 86.6  | 64.6 |
| Wang C 2015  | Asian     | serum  | 19  | 62.1 | 19  | 61.8 | NSCLC | HC | I-IV | miR-483-5p, miR-193a-3p, miR-25, miR-214, miR-7                                          |                 | let-7d/g/i | 100.0 | 84.0 |
| Wang C 2015  | Asian     | serum  | 63  | 59.7 | 63  | 61.9 | NSCLC | HC | I-IV | miR-483-5p, miR-193a-3p, miR-25, miR-214, miR-7                                          |                 | let-7d/g/i | 89.0  | 68.0 |
| Wang C 2015  | Caucasian | serum  | 108 | 67.2 | 48  | 58.5 | NSCLC | HC | I-IV | miR-483-5p, miR-193a-3p, miR-25, miR-214, miR-7                                          |                 | let-7d/g/i | 95.0  | 84.0 |
| Wang C 2015  | Caucasian | serum  | 108 | 67.2 | 56  | 63.7 | NSCLC | BD | I-IV | miR-483-5p, miR-193a-3p, miR-25, miR-214, miR-7                                          |                 | let-7d/g/i | 95.0  | 95.0 |
| Meng XD 2015 | Caucasian | serum  | 180 | 60.0 | 66  | 59.0 | EOC   | HC | I-IV | miR-7, miR-25, miR-93, miR-429                                                           |                 | cel-miR-39 | 93.0  | 92.0 |
| Meng XD 2015 | Caucasian | serum  | 180 | 60.0 | 66  | 59.0 | EOC   | HC | I-IV | miR-25                                                                                   |                 | cel-miR-39 | 92.4  | 63.9 |
| Li M 2015    | Asian     | plasma | 56  | NA   | 95  | NA   | PTC   | BD | I-IV | miR-25                                                                                   |                 | U6         | 92.8  | 68.8 |
| Jia WH 2015  | Asian     | serum  | 123 | 46.0 | 94  | 47.8 | CC    | HC | I-IV | miR-21, miR-29a, miR-25, miR-200a, miR-486-5p                                            |                 | let-7d/j/i | 81.0  | 88.6 |
| Wang P 2015  | Asian     | serum  | 142 | 61.1 | 111 | 59.8 | LC    | HC | I-IV | miR-125a-5p, miR-25, miR-126                                                             |                 | cel-miR-39 | 88.0  | 82.6 |
| Wang P 2015  | Asian     | serum  | 94  | NA   | 111 | 59.8 | LC    | HC | I-II | miR-125a-5p, miR-25, miR-126                                                             |                 | cel-miR-39 | 87.5  | 87.5 |
| Wang P 2015  | Asian     | serum  | 94  | NA   | 111 | 59.8 | LC    | HC | I-II | miR-25                                                                                   |                 | cel-miR-39 | 83.3  | 75.0 |

|                 |           |        |     |      |     |      |      |       |       |                                                          |  |                                  |      |      |
|-----------------|-----------|--------|-----|------|-----|------|------|-------|-------|----------------------------------------------------------|--|----------------------------------|------|------|
| Zhu C 2014      | Asian     | plasma | 40  | 53.8 | 40  | 53.6 | GC   | HC    | I-II  | miR-25                                                   |  | cel-miR-39                       | 87.5 | 97.5 |
| Zhu C 2014      | Asian     | plasma | 40  | 53.8 | 40  | 53.6 | GC   | HC    | I-II  | miR-16, miR-25, miR-92a, miR-451, miR-486-5p             |  | cel-miR-39                       | 97.5 | 87.5 |
| Zhu C 2014      | Asian     | plasma | 48  | 56.6 | 102 | 54.0 | GC   | HC,BD | I-II  | miR-25                                                   |  | cel-miR-39                       | 41.7 | 97.1 |
| Zhu C 2014      | Asian     | plasma | 48  | 56.6 | 102 | 54.0 | GC   | HC,BD | I-II  | miR-16, miR-25, miR-92a, miR-451, miR-486-5p             |  | cel-miR-39                       | 72.9 | 89.2 |
| Wu CY 2014      | Asian     | serum  | 63  | 62.0 | 63  | 59.7 | ESCC | HC    | I-IV  | miR-25                                                   |  | let-7d/g/i                       | 81.0 | 81.0 |
| Pan WZ 2014     | Asian     | plasma | 30  | 58.4 | 26  | NA   | PC   | HC    | I-IV  | miR-25                                                   |  | cel-miR-39                       | 73.3 | 73.1 |
| Mengual LV 2013 | Caucasian | urine  | 151 | 72.0 | 126 | 63.0 | BLC  | HC,BD | NA    | miR-25, miR-18a, miR-187, miR-204,miR-142-3p, miR-140-3p |  | miR-103, miR-30c                 | 84.8 | 86.5 |
| Hu ZB 2012      | Asian     | serum  | 48  | 54.0 | 48  | 51.0 | BC   | HC    | I-III | miR-16, miR-25, miR-222, miR-324-3p                      |  | miR-484, miR-191                 | 91.7 | 89.6 |
| Hu ZB 2012      | Asian     | serum  | 76  | 53.0 | 76  | 49.2 | BC   | HC    | I-III | miR-16, miR-25, miR-222, miR-324-3p                      |  | miR-484, miR-191                 | 92.1 | 93.4 |
| li LM 2010      | Asian     | serum  | 55  | 52.8 | 50  | 47.7 | HCC  | HC    | NA    | miR-375, miR-25,let-7f                                   |  | -                                | 97.9 | 99.1 |
| <b>MiR-363</b>  |           |        |     |      |     |      |      |       |       |                                                          |  |                                  |      |      |
| Wu CW 2017      | Caucasian | blood  | 29  | 61.2 | 115 | 66.2 | CRC  | HC    | I-IV  | miR-144-3p, miR-144-5p, miR-486-5p, miR-363              |  | miR-451a, miR-20b-5p, cel-miR-39 | 66.0 | 95.0 |

a: miR-20a-5p, miR-25-3p, miR-30a-5p, miR-92a-3p, miR-132-3p, miR-185-5p, miR-320a, miR-324-3p.

b: miR-93, miR-26b, miR-192, miR-103a, miR-142-3p.

Abbreviation: AML, acute myeloid leukemia; BC, breast cancer; BLC, bladder cancer; CC, cervical cancer; CF, cerebrospinal fluid; CRC, colorectal cancer;

EEC, endometrioid endometrial carcinoma; EOC, epithelial ovarian cancer; ESCC, esophageal squamous cell carcinoma; GC, gastric cancer; HCC,

hepatocellular carcinoma; LC, lung cancer; LUAD, lung adenocarcinomas; MM, malignant mesothelioma; N, number; NMIBC, non-muscle invasive bladder

cancer; NSCLC, non-small cell lung cancer; OS, osteosarcoma; PCNSL, primary central nervous system lymphoma; PRC, prostate cancer; PTC, papillary

thyroid carcinoma; RCC, renal cell carcinoma; SEN, sensitivity; SPE, specificity.

**Table S2 main characteristics of enrolled researches in prognostic meta-analyses**

| Study ID | No. of | No. of | ethnicity | speci | cancer | stage | miRNA | reference | outco | Median   | HR | LL | UL | NO |
|----------|--------|--------|-----------|-------|--------|-------|-------|-----------|-------|----------|----|----|----|----|
|          | low    | high   |           | men   |        |       | miRNA |           | me    | Follow-u |    |    |    | S  |
|          |        |        |           |       |        |       |       |           |       | p        |    |    |    |    |
|          |        |        |           |       |        |       |       |           |       | (month)  |    |    |    |    |

**MiR-92a**

|                |   |    |     |           |        |       |     |         |              |     |      |       |       |        |   |
|----------------|---|----|-----|-----------|--------|-------|-----|---------|--------------|-----|------|-------|-------|--------|---|
| Ingelmo-Torres | M | NA | NA  | Caucasian | Urinar | NMIBC | NA  | miR-92a | miR-103-3p,  | PFS | 47   | 6.210 | 2.090 | 18.450 | 7 |
| 2017           |   |    |     |           | y cell |       |     |         | miR-30c-5p   |     |      |       |       |        |   |
| Ren CL 2016    |   | 34 | 146 | Asian     | tissue | GC    | I - | miR-92a | Scramble-miR | OS  | 85.2 | 3.340 | 1.670 | 6.700  | 6 |

IV

|                 |    |     |           |           |        |        |                     |                     |              |      |       |       |         |        |   |
|-----------------|----|-----|-----------|-----------|--------|--------|---------------------|---------------------|--------------|------|-------|-------|---------|--------|---|
| Yang W 2015     | 53 | 53  | Asian     | tissue    | HCC    | I -    | miR-92a             | U6                  | OS           | 38,7 | 2.283 | 1.104 | 4.717   | 8      |   |
|                 |    |     |           |           |        | IV     |                     |                     |              |      |       |       |         |        |   |
| Zhou T 2013     | 41 | 41  | Asian     | tissue    | CRC    | I -    | miR-92a             | U6                  | OS           | NA   | 2.342 | 1.072 | 5.115   | 7      |   |
|                 |    |     |           |           |        | IV     |                     |                     |              |      |       |       |         |        |   |
| Nilsson S 2012  | 59 | 58  | Caucasian | tissue    | BC     | I      | miR-92a             | NA                  | RFS          | 78   | 0.375 | 0.145 | 0.972   | 7      |   |
|                 |    |     |           |           |        | -III   |                     |                     |              |      |       |       |         |        |   |
| <b>MiR-25</b>   |    |     |           |           |        |        |                     |                     |              |      |       |       |         |        |   |
| Jacob H 2017    | 48 | 63  | Caucasian | tissue    | CRC    | II-III | miRNAs <sup>a</sup> | miRNAs <sup>b</sup> | DFS          | NA   | 21.40 | 4.210 | 108.700 | 7      |   |
| Jacob H 2017    | 90 | 119 | Caucasian | tissue    | CRC    | II-III | miRNAs <sup>a</sup> | miRNAs <sup>b</sup> | DFS          | NA   | 2.000 | 1.040 | 3.890   | 8      |   |
| Goossens-Beumer | I  | 29  | 21        | Caucasian | tissue | CRC    | II-III              | miR-25              | miR-16-5p,mi | RFS  | 51.2  | 2.370 | 0.930   | 6.030  | 8 |
| 2015            |    |     |           |           |        |        |                     | R-26a-5p            |              |      |       |       |         |        |   |
| Goossens-Beumer | I  | 26  | 17        | Caucasian | tissue | CRC    | II-III              | miR-25              | miR-16-5p,mi | RFS  | 83.5  | 5.760 | 1.820   | 18.200 | 8 |
| 2015            |    |     |           |           |        |        |                     | R-26a-5p            |              |      |       |       |         |        |   |
| Wu CY 2014      | 12 | 51  | Asian     | serum     | ESCC   | I -    | miR-25              | let-7d/g/i          | OS           | 19.6 | 3.840 | 1.020 | 14.410  | 6      |   |
|                 |    |     |           |           |        | IV     |                     |                     |              |      |       |       |         |        |   |
| Wu CH 2014      | 73 | 121 | Asian     | serum     | ESCC   | I -    | miR-25              | U6, miR-16          | OS           | 31.3 | 1.127 | 0.778 | 1.637   | 7      |   |
|                 |    |     |           |           |        | IV     |                     |                     |              |      |       |       |         |        |   |
| Wang X 2014     | NA | NA  | Asian     | tissue    | EOC    | I -    | miR-25              | U6                  | OS           | NA   | 2.119 | 1.568 | 3.221   | 6      |   |
|                 |    |     |           |           |        | IV     |                     |                     |              |      |       |       |         |        |   |
| Su ZX 2014      | NA | NA  | Asian     | tissue    | HCC    | I -    | miR-25              | U6                  | OS           | 47   | 2.179 | 1.876 | 4.335   | 6      |   |
|                 |    |     |           |           |        | IV     |                     |                     |              |      |       |       |         |        |   |
| Li XJ 2014      | 78 | 108 | Asian     | tissue    | CRC    | I -    | miR-25              | U44                 | OS           | NA   | 1.900 | 1.220 | 2.970   | 8      |   |



## IV

Xu FX 2014 49 51 Asian tissue LUAD I - miR-25 U6 OS 34 2.340 1.020 5.350 6

## IV

Jonsdottir K 2012 119 84 Caucasian tissue BC NA miR-25 U6 MFS 122 2.400 1.100 5.300 8

a: miR-143-5p, miR-27a-3p, miR-31-5p, miR-181a-5p, miR-30b-5p, miR-30d-5p, miR-146a-5p, miR-23a-3p, miR-150-5p, miR-210-3p, miR-25-3p,

miR-196a-5p, miR-148a-3p, miR-222-3p, miR-30c-5p and miR-223-3p; b: UniSp3, cel-miR-39-3p, UniSp2, UniSp4, UniSp5, UniSp6; Abbreviation: HR,

hazard ratio; LL, lower limit; UL, upper Limit; NOS, Newcastle-Ottawa Scale; NMIBC, non-muscle invasive bladder cancer; GC, gastric cancer; HCC,

hepatocellular carcinoma; CRC, colorectal cancer; BC, breast cancer; ESCC, esophageal squamous cell carcinoma; EOC, epithelial ovarian cancer; LUAD,

lung adenocarcinoma; OS, overall survival; PFS, progression-free survival; RFS, relapse free survival; DFS, disease free survival; MFS, metastasis free

survival.

**Table S3 NOS scores for each study included in the prognosis meta-analysis**

| Items                  | Representativeness of the exposed cohort (1) | Selection of the non-exposed cohort (1) | Ascertainment of exposure (1) | Demonstration that outcome of interest was not present at start of study (1) | Comparability of cohorts on the basis of the design or analysis (2) | Assessment of outcome (1) | Was follow-up long enough for outcomes to occur (1) | Adequacy of follow up of cohorts (1) | total scores (9) |
|------------------------|----------------------------------------------|-----------------------------------------|-------------------------------|------------------------------------------------------------------------------|---------------------------------------------------------------------|---------------------------|-----------------------------------------------------|--------------------------------------|------------------|
| Jacob H 2017           | 0                                            | 1                                       | 1                             | 1                                                                            | 1                                                                   | 1                         | 1                                                   | 1                                    | 7                |
| Jacob H 2017           | 0                                            | 1                                       | 1                             | 1                                                                            | 2                                                                   | 1                         | 1                                                   | 1                                    | 8                |
| Ingelmo-Torres M 2017  | 0                                            | 1                                       | 1                             | 1                                                                            | 1                                                                   | 1                         | 1                                                   | 1                                    | 7                |
| Ren CL 2016            | 0                                            | 0                                       | 1                             | 1                                                                            | 1                                                                   | 1                         | 1                                                   | 1                                    | 6                |
| Yang W 2015            | 1                                            | 1                                       | 1                             | 1                                                                            | 1                                                                   | 1                         | 1                                                   | 1                                    | 8                |
| Goossens-Beumer I 2015 | 1                                            | 1                                       | 1                             | 1                                                                            | 1                                                                   | 1                         | 1                                                   | 1                                    | 8                |
| Wu CY 2014             | 1                                            | 1                                       | 1                             | 1                                                                            | 1                                                                   | 1                         | 0                                                   | 0                                    | 6                |
| Wu CH 2014             | 1                                            | 1                                       | 1                             | 1                                                                            | 1                                                                   | 1                         | 0                                                   | 1                                    | 7                |
| Wang X 2014            | 1                                            | 0                                       | 1                             | 1                                                                            | 1                                                                   | 0                         | 1                                                   | 1                                    | 6                |
| Su ZX 2014             | 1                                            | 0                                       | 1                             | 1                                                                            | 1                                                                   | 0                         | 1                                                   | 1                                    | 6                |
| Li XJ 2014             | 1                                            | 1                                       | 1                             | 1                                                                            | 1                                                                   | 1                         | 1                                                   | 1                                    | 8                |
| Zhou T 2013            | 1                                            | 0                                       | 1                             | 1                                                                            | 1                                                                   | 1                         | 1                                                   | 1                                    | 7                |
| Nilsson S 2012         | 1                                            | 0                                       | 1                             | 1                                                                            | 1                                                                   | 1                         | 1                                                   | 1                                    | 7                |

|                   |   |   |   |   |   |   |   |   |   |
|-------------------|---|---|---|---|---|---|---|---|---|
| Jonsdottir K 2012 | 1 | 1 | 1 | 1 | 1 | 1 | 1 | 1 | 8 |
| Xu FX 201         | 1 | 1 | 1 | 1 | 1 | 1 | 0 | 0 | 6 |
| Ranade AR 2010    | 1 | 1 | 1 | 1 | 0 | 1 | 1 | 1 | 7 |

NOS, newcastle - ottawa quality assessment.

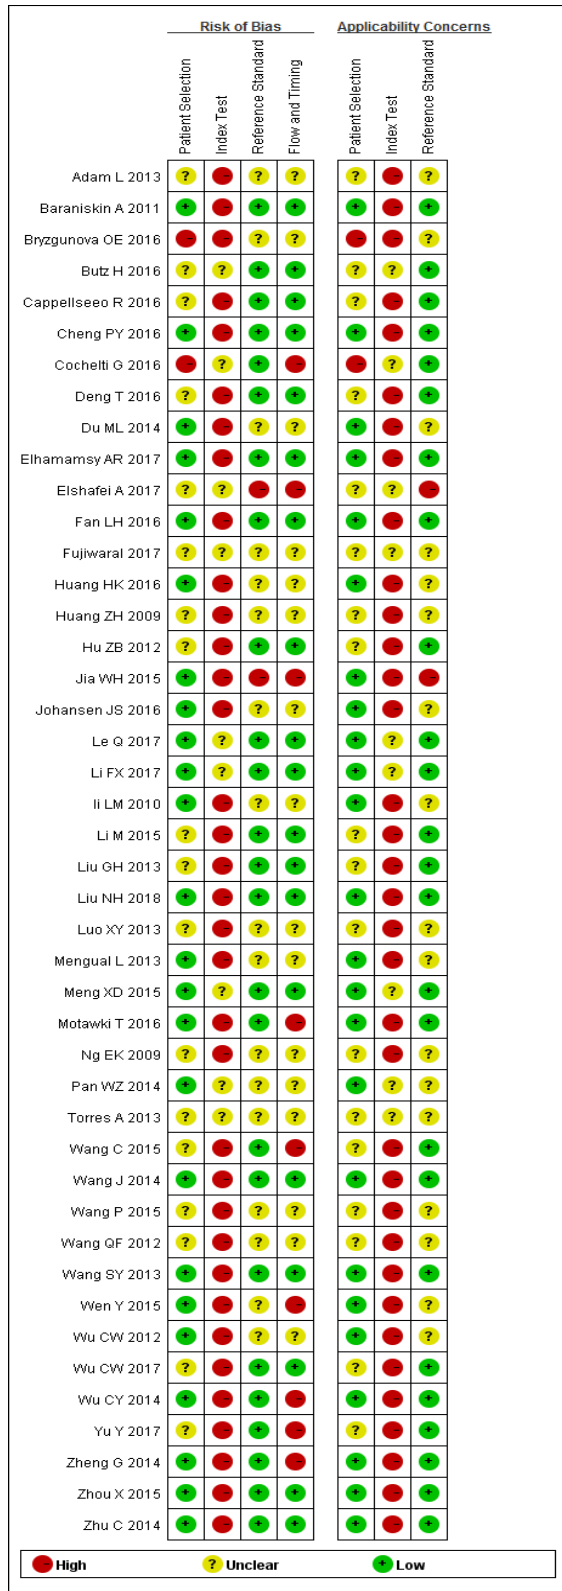

Figure S1: Risk of bias graph: a plot of the distribution of judgments (Yes, No, Unclear) across studies for each

risk of bias entry for each enrolled literature in the diagnostic meta-analysis.

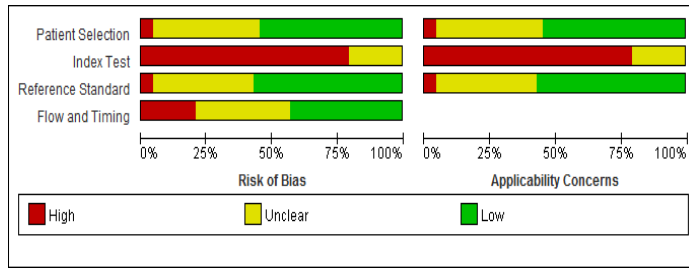

**Figure S2:** Risk of bias summary: a summary table of review authors' judgments for each risk of bias entry for each study in the diagnostic meta-analysis: proportion of articles with risk of bias (left) and proportion of articles with regarding applicability (right).

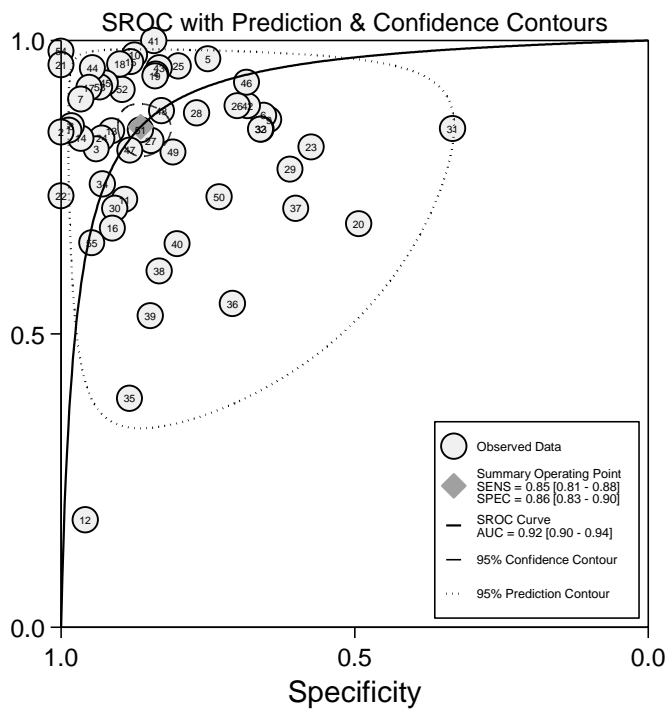

**Figure S3:** SROC curve of the whole miR-92a family for cancer diagnostic meta-analysis. SENS, sensitivity; SPEC, specificity; SROC, summary receiver operating characteristic; AUC, the area under the SROC curve.

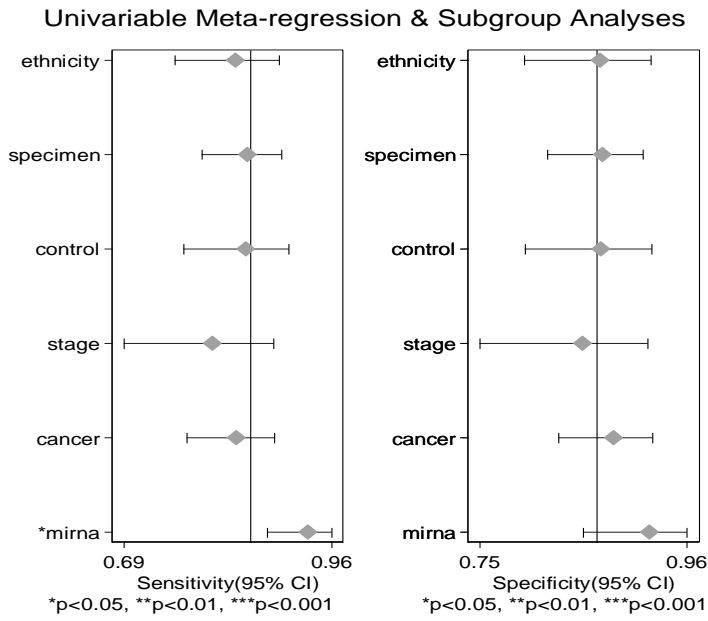

**Figure S4:** Forest plots for the diagnostic meta-regression analysis: sensitivity (left) and specificity (right). The factors included ethnicity, specimen, control types (healthy controls or patients with benign diseases), stage, cancer types and miRNA-profilings (single miRNA or multiple miRNAs)

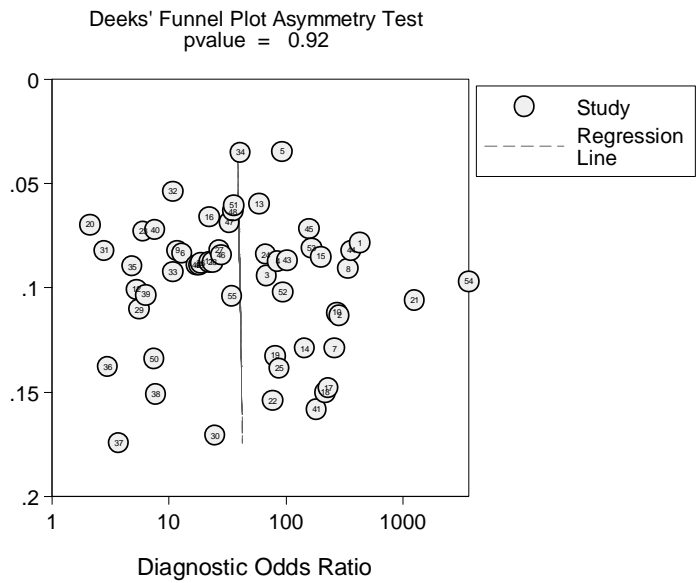

**Figure S5:** The Deek's test for assessing the publication bias for miR-92a family in the detection of human cancers.

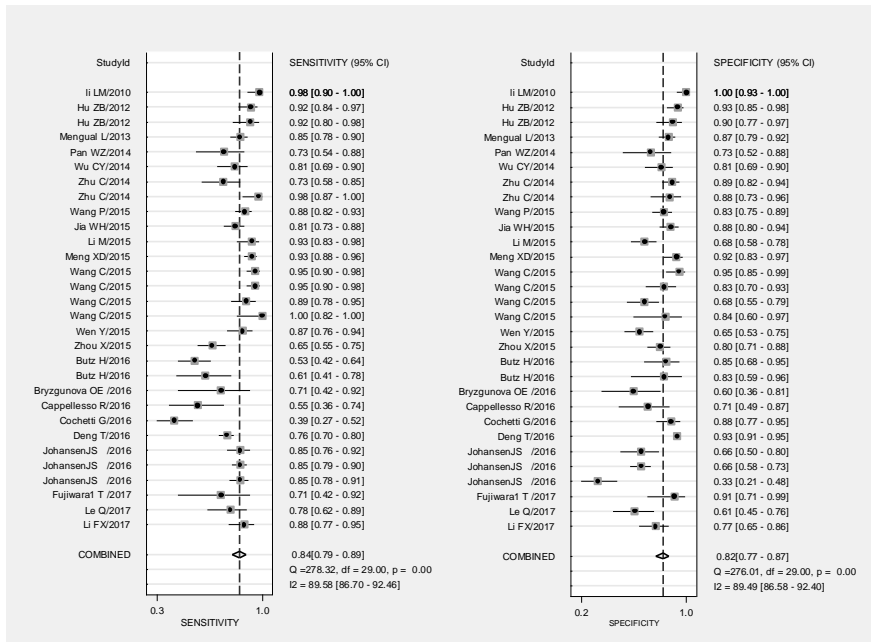

**Figure S6:** Forest plots of sensitivity and specificity for the cancer diagnosis of miR-25. Both the sensitivity and specificity of each study were showed by square with its 95% Confidence interval showed by the error bars.

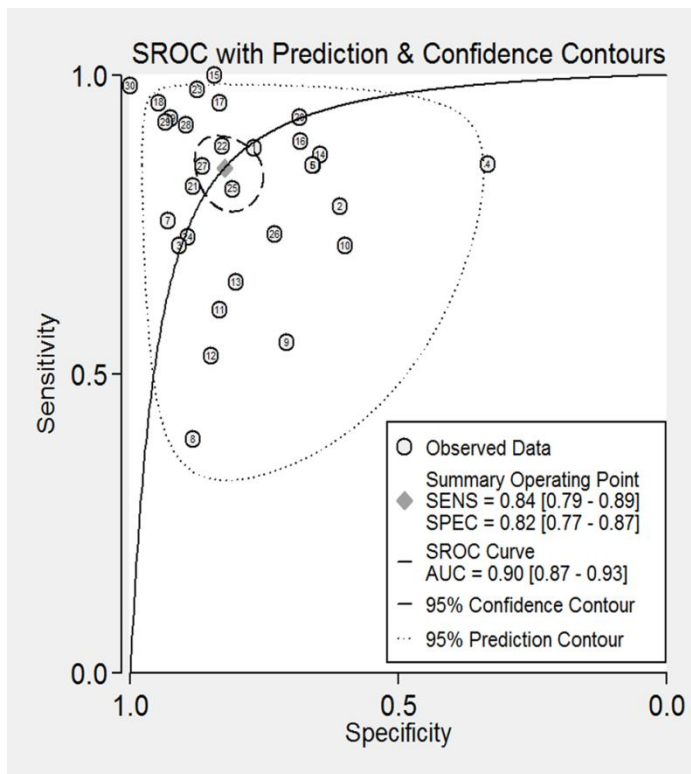

**Figure S7:** SROC curve of miR-25 for cancer diagnostic meta-analysis. SENS, sensitivity; SPEC, specificity; SROC, summary receiver operating characteristic; AUC, the area under the SROC curve.

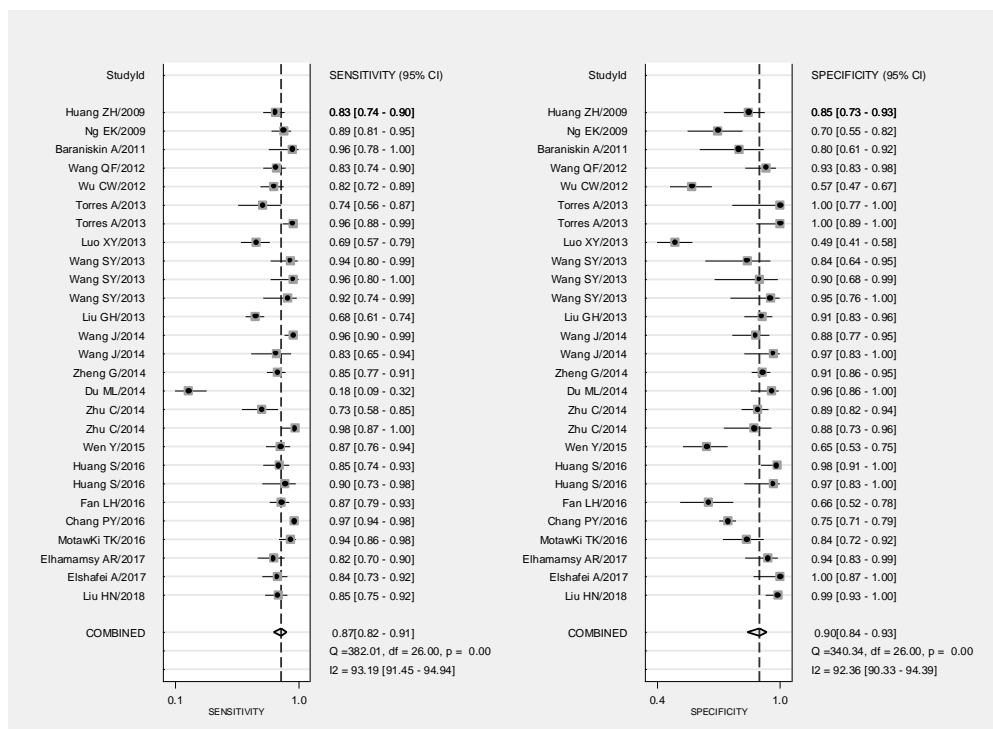

**Figure S8:** Forest plots of sensitivity and specificity for the cancer diagnosis of miR-92a. Both the sensitivity and specificity of each study were showed by square with its 95% Confidence interval showed by the error bars.

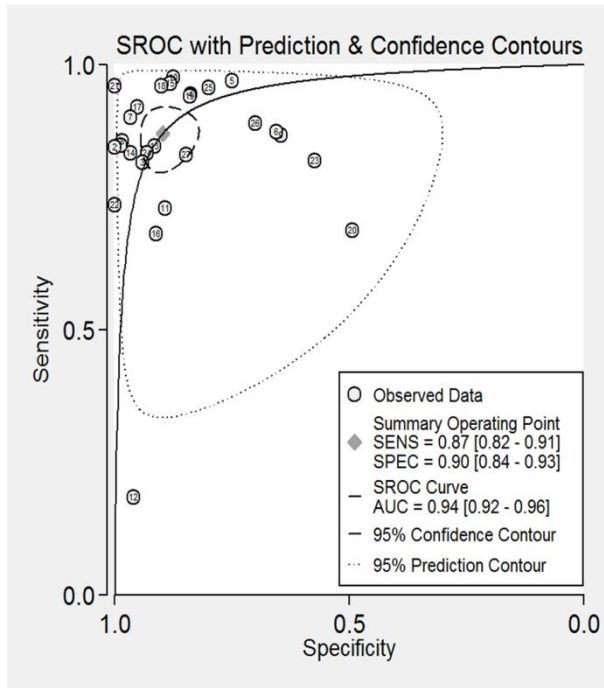

**Figure S9:** SROC curve of miR-92a for cancer diagnostic meta-analysis. SENS, sensitivity; SPEC, specificity; SROC, summary receiver operating characteristic; AUC, the area under the SROC curve.

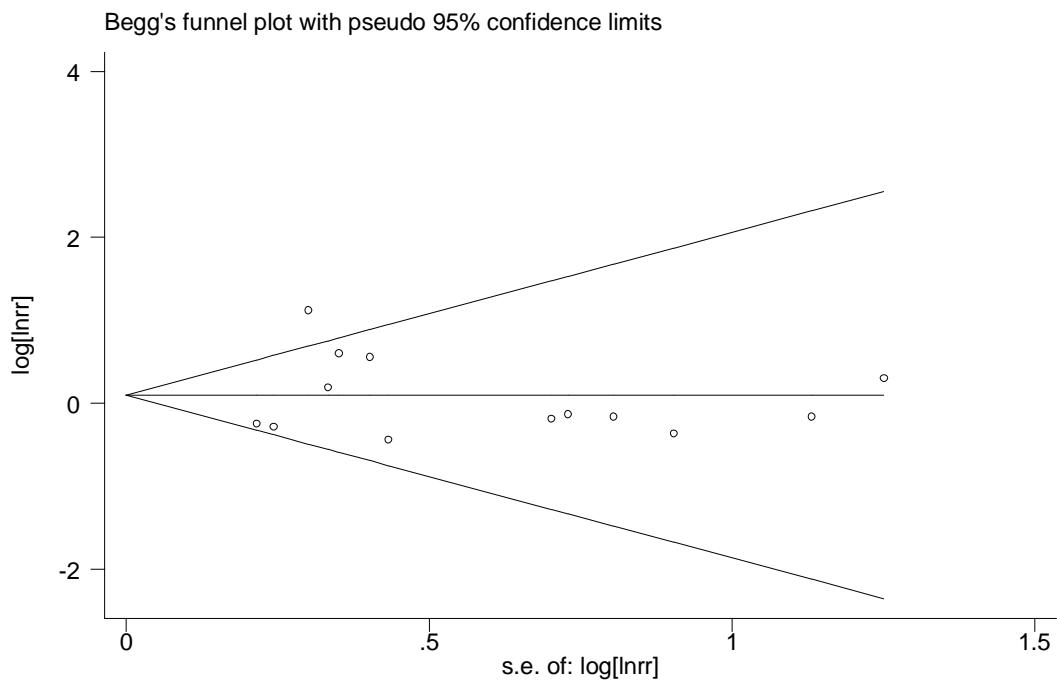

**Figure S10:** The Begg's funnel plot to assess the publication bias for miR-92a family in cancer prognosis prediction.

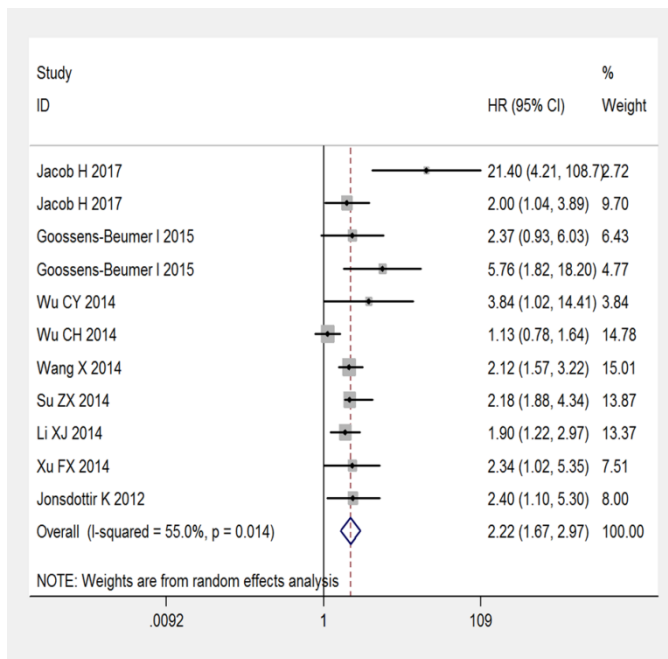

**Figure S11:** Forest plot of the prognostic meta-analysis of the association between miR-25 and the risk of cancers. HR, hazard ratio; 95% CI, 95% confidence interval.



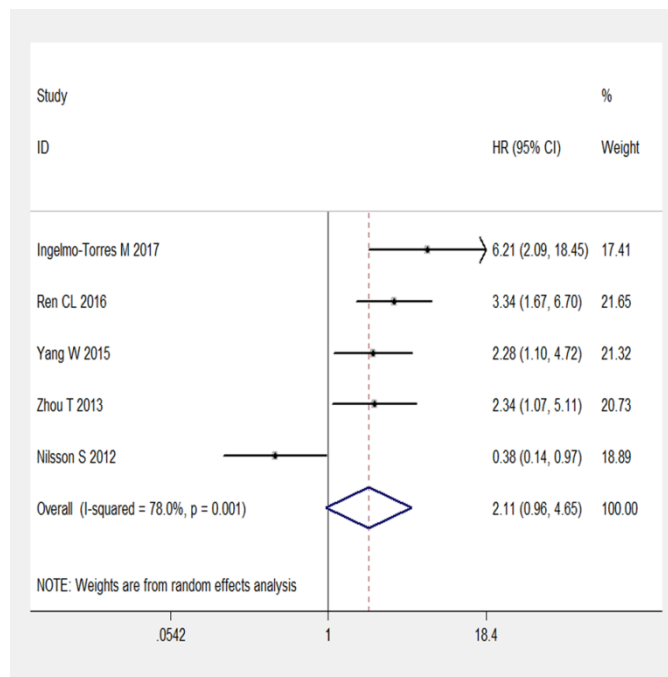

**Figure S12:** Forest plot of the prognostic meta-analysis of the association between miR-92a and the risk of cancers. HR, hazard ratio; 95% CI, 95% confidence interval.

## Reference

1. Liu HN, Liu TT, Wu H, et al. Serum microRNA signatures and metabolomics have high diagnostic value in colorectal cancer using two novel methods. *Cancer science*. 2018;109(4):1185-1194.
2. Elshafei A, Shaker O, Abd El-Motaal O, Salman T. The expression profiling of serum miR-92a, miR-375, and miR-760 in colorectal cancer: An Egyptian study. *Tumour biology : the journal of the International Society for Oncodevelopmental Biology and Medicine*. 2017;39(6):1010428317705765.
3. Elhamamsy AR, El Sharkawy MS, Zanaty AF, Mahrous MA, Mohamed AE, Abushaaban EA. Circulating miR-92a, miR-143 and miR-342 in Plasma are Novel Potential Biomarkers for Acute Myeloid Leukemia. *International journal of molecular and cellular medicine*. 2017;6(2):77-86.
4. Motawi TK, Rizk SM, Ibrahim TM, Ibrahim IA. Circulating microRNAs, miR-92a, miR-100 and miR-143, as non-invasive biomarkers for bladder cancer diagnosis. *Cell biochemistry and function*. 2016;34(3):142-148.
5. Chang PY, Chen CC, Chang YS, et al. MicroRNA-223 and microRNA-92a in stool and plasma

- samples act as complementary biomarkers to increase colorectal cancer detection. *Oncotarget*. 2016;7(9):10663-10675.
6. Fan L, Qi H, Teng J, et al. Identification of serum miRNAs by nano-quantum dots microarray as diagnostic biomarkers for early detection of non-small cell lung cancer. *Tumor Biology*. 2016;37(6):7777-7784.
  7. Huang S, Wang J, Li J, et al. Serum microRNA expression profile as a diagnostic panel for gastric cancer. *Japanese journal of clinical oncology*. 2016;46(9):811-818.
  8. Wen Y, Han J, Chen J, et al. Plasma miRNAs as early biomarkers for detecting hepatocellular carcinoma. *International journal of cancer*. 2015.
  9. Zhu C, Ren C, Han J, et al. A five-microRNA panel in plasma was identified as potential biomarker for early detection of gastric cancer. *British journal of cancer*. 2014;110(9):2291-2299.
  10. Du M, Liu S, Gu D, et al. Clinical potential role of circulating microRNAs in early diagnosis of colorectal cancer patients. *Carcinogenesis*. 2014;35(12):2723-2730.
  11. Zheng G, Du L, Yang X, et al. Serum microRNA panel as biomarkers for early diagnosis of colorectal adenocarcinoma. *British journal of cancer*. 2014;111(10):1985-1992.
  12. Wang J, Huang SK, Zhao M, et al. Identification of a circulating microRNA signature for colorectal cancer detection. *PLoS one*. 2014;9(4):e87451.
  13. Liu GH, Zhou ZG, Chen R, et al. Serum miR-21 and miR-92a as biomarkers in the diagnosis and prognosis of colorectal cancer. *Tumour biology : the journal of the International Society for Oncodevelopmental Biology and Medicine*. 2013;34(4):2175-2181.
  14. Wang S, Wang L, Bayaxi N, et al. A microRNA panel to discriminate carcinomas from high-grade intraepithelial neoplasms in colonoscopy biopsy tissue. *Gut*. 2013;62(2):280-289.
  15. Luo X, Stock C, Burwinkel B, Brenner H. Identification and evaluation of plasma microRNAs for early detection of colorectal cancer. *PLoS one*. 2013;8(5):e62880.
  16. Torres A, Torres K, Pesci A, et al. Diagnostic and prognostic significance of miRNA signatures in tissues and plasma of endometrioid endometrial carcinoma patients. *International journal of cancer*. 2013;132(7):1633-1645.
  17. Wu CW, Ng SS, Dong YJ, et al. Detection of miR-92a and miR-21 in stool samples as potential screening biomarkers for colorectal cancer and polyps. *Gut*. 2012;61(5):739-745.
  18. Wang Q, Huang Z, Ni S, et al. Plasma miR-601 and miR-760 Are Novel Biomarkers for the Early Detection of Colorectal Cancer. *PLoS one*. 2012;7(9).
  19. Baraniskin A, Kuhnhen J, Schlegel U, et al. Identification of microRNAs in the cerebrospinal fluid as marker for primary diffuse large B-cell lymphoma of the central nervous system. *Blood*. 2011;117(11):3140-3146.
  20. Ng EKO, Chong WWS, Jin H, et al. Differential expression of microRNAs in plasma of patients with colorectal cancer: A potential marker for colorectal cancer screening. *Gut*. 2009;58(10):1375-1381.
  21. Huang Z, Huang D, Ni S, Peng Z, Sheng W, Du X. Plasma microRNAs are promising novel biomarkers for early detection of colorectal cancer. *International journal of cancer*. 2010;127(1):118-126.
  22. Li F, Guo Y, Liu J, Zhang R. The significance of elevated plasma expression of microRNA 106b~25 clusters in gastric cancer. *PLoS one*. 2017;12(5).
  23. Le Q, Jianhua N, Mulati, Yu X, Jiageng H. Increased miR-25 expression in serum of gastric

- cancer patients is correlated with CA19-9 and acts as a potential diagnostic biomarker. *Open Medicine (Poland)*. 2017;12(1):266-270.
24. Fujiwara T, Uotani K, Yoshida A, et al. Clinical significance of circulating miR-25-3p as a novel diagnostic and prognostic biomarker in osteosarcoma. *Oncotarget*. 2017;8(20):33375-33392.
  25. Johansen JS, Calatayud D, Albiéri V, et al. The potential diagnostic value of serum microRNA signature in patients with pancreatic cancer. *International journal of cancer*. 2016;139(10):2312-2324.
  26. Deng T, Yuan Y, Zhang C, et al. Identification of Circulating miR-25 as a Potential Biomarker for Pancreatic Cancer Diagnosis. *Cellular Physiology and Biochemistry*. 2016;39(5):1716-1722.
  27. Cochetti G, Poli G, Guelfi G, Boni A, Egidì MG, Mearini E. Different levels of serum microRNAs in prostate cancer and benign prostatic hyperplasia: Evaluation of potential diagnostic and prognostic role. *OncoTargets and Therapy*. 2016;9:7545-7553.
  28. Cappellesso R, Nicolè L, Caroccia B, et al. Young investigator challenge: MicroRNA-21/MicroRNA-126 profiling as a novel tool for the diagnosis of malignant mesothelioma in pleural effusion cytology. *Cancer cytopathology*. 2016;124(1):28-37.
  29. Bryzgunova OE, Zaripov MM, Skvortsova TE, et al. Comparative study of extracellular vesicles from the urine of healthy individuals and prostate cancer patients. *PLoS one*. 2016;11(6).
  30. Butz H, Nofech-Mozes R, Ding Q, et al. Exosomal MicroRNAs Are Diagnostic Biomarkers and Can Mediate Cell-Cell Communication in Renal Cell Carcinoma. *European Urology Focus*. 2016;2(2):210-218.
  31. Zhou X, Zhu W, Li H, et al. Diagnostic value of a plasma microRNA signature in gastric cancer: a microRNA expression analysis. *Scientific reports*. 2015;5:11251.
  32. Wang C, Wang X, Su Z, Fei H, Liu X, Pan Q. miR-25 promotes hepatocellular carcinoma cell growth, migration and invasion by inhibiting RhoGDI1. *Oncotarget*. 2015;6(34):36231-36244.
  33. Meng X, Joosse SA, Müller V, et al. Diagnostic and prognostic potential of serum MIR-7, MIR-16, MIR-25, MIR-93, MIR-182, MIR-376a and MIR-429 in ovarian cancer patients. *British journal of cancer*. 2015;113(9):1358-1366.
  34. Li M, Song Q, Li H, Lou Y, Wang L. Erratum: Circulating MIR-25-3p and MIR-451a may be potential biomarkers for the diagnosis of papillary thyroid carcinoma (PLoS ONE (2015) 10:7 (e0132403) DOI:10.1371/journal.pone.0132403). *PLoS one*. 2015;10(8).
  35. Jia W, Wu Y, Zhang Q, Gao G, Zhang C, Xiang Y. Expression profile of circulating microRNAs as a promising fingerprint for cervical cancer diagnosis and monitoring. *Molecular and Clinical Oncology*. 2015;3(4):851-858.
  36. Wang P, Yang D, Zhang H, et al. Early detection of lung cancer in serum by a panel of MicroRNA biomarkers. *Clinical Lung Cancer*. 2015;16(4):313-319.e311.
  37. Wu C, Wang C, Guan X, et al. Diagnostic and prognostic implications of a serum miRNA panel in oesophageal squamous cell carcinoma. *PLoS one*. 2014;9(3):e92292.
  38. Pan W, Tang W, Yuan W, et al. Expression and clinical significance of plasma small RNA in patients with pancreatic cancer. *Chinese Journal of Oncology*. 2014;36(5):351-354.
  39. Mengual L, Lozano JJ, Ingelmo-Torres M, Gazquez C, Ribal MJ, Alcaraz A. Using microRNA profiling in urine samples to develop a non-invasive test for bladder cancer. *International journal of cancer*. 2013;133(11):2631-2641.
  40. Hu Z, Dong J, Wang LE, et al. Serum microRNA profiling and breast cancer risk: The use of miR-484/191 as endogenous controls. *Carcinogenesis*. 2012;33(4):828-834.

41. Li LM, Hu ZB, Zhou ZX, et al. Serum microRNA profiles serve as novel biomarkers for HBV infection and diagnosis of HBV-positive hepatocarcinoma. *Cancer Research*. 2010;70(23):9798-9807.
42. Wu CW, Cao X, Berger CK, et al. Novel Approach to Fecal Occult Blood Testing by Assay of Erythrocyte-Specific microRNA Markers. *Digestive Diseases and Sciences*. 2017;62(8):1985-1994.
43. Ingelmo-Torres M, Lozano JJ, Izquierdo L, et al. Urinary cell microRNA-based prognostic classifier for nonmuscle invasive bladder cancer. *Oncotarget*. 2017;8(11):18238-18247.
44. Ren C, Wang W, Han C, et al. Expression and prognostic value of miR-92a in patients with gastric cancer. *Tumour biology : the journal of the International Society for Oncodevelopmental Biology and Medicine*. 2016;37(7):9483-9491.
45. Yang W, Dou C, Wang Y, et al. MicroRNA-92a contributes to tumor growth of human hepatocellular carcinoma by targeting FBXW7. *Oncol Rep*. 2015;34(5):2576-2584.
46. Zhou T, Zhang G, Liu Z, Xia S, Tian H. Overexpression of miR-92a correlates with tumor metastasis and poor prognosis in patients with colorectal cancer. *International journal of colorectal disease*. 2013;28(1):19-24.
47. Nilsson S, Moller C, Jirstrom K, et al. Downregulation of miR-92a is associated with aggressive breast cancer features and increased tumour macrophage infiltration. *PloS one*. 2012;7(4):e36051.
48. Jacob H, Stanisavljevic L, Storli KE, Hestetun KE, Dahl O, Myklebust MP. Identification of a sixteen-microRNA signature as prognostic biomarker for stage II and III colon cancer. *Oncotarget*. 2017;8(50):87837-87847.
49. Goossens-Beumer IJ, Derr RS, Buermans HPJ, et al. MicroRNA classifier and nomogram for metastasis prediction in colon cancer. *Cancer Epidemiology Biomarkers and Prevention*. 2015;24(1):187-197.
50. Wu C, Li M, Hu C, Duan H. Clinical significance of serum miR-223, miR-25 and miR-375 in patients with esophageal squamous cell carcinoma. *Mol Biol Rep*. 2014;41(3):1257-1266.
51. Wang X, Meng X, Li H, Liu W, Shen S, Gao Z. MicroRNA-25 expression level is an independent prognostic factor in epithelial ovarian cancer. *Clinical and Translational Oncology*. 2014;16(11):954-958.
52. Su ZX, Zhao J, Rong ZH, Geng WM, Wu YG, Qin CK. Upregulation of microRNA-25 associates with prognosis in hepatocellular carcinoma. *Diagnostic pathology*. 2014;9:47.
53. Li X, Yang C, Wang X, Zhang J, Zhang R, Liu R. The expression of miR-25 is increased in colorectal cancer and is associated with patient prognosis. *Medical Oncology*. 2014;31(1).
54. Xu FX, Su YL, Zhang H, Kong JY, Yu H, Qian BY. Prognostic implications for high expression of MiR-25 in lung adenocarcinomas of female non-smokers. *Asian Pacific Journal of Cancer Prevention*. 2014;15(3):1197-1203.
55. Jonsdottir K, Janssen SR, Da Rosa FC, et al. Validation of Expression Patterns for Nine miRNAs in 204 Lymph-Node Negative Breast Cancers. *PloS one*. 2012;7(11).
